1 **Cancer causes dysfunctional insulin signaling and glucose transport in a**  
2 **muscle-type specific manner**

3 Steffen H. Raun<sup>1</sup>, Jonas Roland Knudsen<sup>1</sup>, Xiuqing Han<sup>1</sup>, Thomas E. Jensen<sup>1</sup>, \*Lykke Sylow<sup>1,2</sup>

4 Orcid: SHR; 0000-0003-2050-505X, JRK; 0000-0002-5471-491X, XH; 0000-0002-8345-1143, TEJ; 0000-0001-  
5 6139-8268, LS; 0000-0003-0905-5932

6 <sup>1</sup>*Section of Molecular Physiology, Department of nutrition, Exercise and Sports, University of Copenhagen,*  
7 *Denmark*

8 <sup>2</sup>*Department of Biomedical Sciences, University of Copenhagen, Denmark* \*Corresponding author:  
9 *Lykkesylow@sund.ku.dk*

10 **Highlights**

- 11 • Cancer abrogates insulin-stimulated glucose transport selectively in oxidative soleus  
12 muscle
- 13 • Multiple TBC1D4 phosphorylation sites are reduced in cancer-associated muscle insulin  
14 resistance
- 15 • Cancer leads to increased AMPK signaling in the glycolytic EDL muscle
- 16 • Cancer alters anabolic insulin signaling in soleus and EDL muscle

17 **Abstract**

18 Metabolic dysfunction and insulin resistance are emerging as hallmarks of cancer and cachexia,  
19 and impair cancer prognosis. Yet, the molecular mechanisms underlying impaired metabolic  
20 regulation is not fully understood. To elucidate the mechanisms behind cancer-induced insulin  
21 resistance in muscle, we isolated *extensor digitorum longus* (EDL) and soleus muscles from  
22 Lewis Lung Carcinoma tumor-bearing mice. Three weeks after tumor inoculation, muscles were  
23 isolated and stimulated with or without a submaximal dose of insulin (1.5 nM). Glucose  
24 transport was measured using 2-[<sup>3</sup>H]Deoxy-Glucose and intramyocellular signaling was  
25 investigated using immunoblotting. In soleus muscles from tumor-bearing mice, insulin-  
26 stimulated glucose transport was abrogated concomitantly with abolished insulin-induced  
27 TBC1D4 and GSK3 phosphorylation. In EDL, glucose transport and TBC1D4 phosphorylation  
28 were not impaired in muscles from tumor-bearing mice, while AMPK signaling was elevated.  
29 Anabolic insulin signaling via phosphorylation of the mTORC1 targets, p70S6K thr389 and  
30 ribosomal-S6 ser235, were decreased by cancer in soleus muscle while increased or unaffected  
31 in EDL. In contrast, the mTOR substrate, pULK1 ser757, was reduced in both soleus and EDL by  
32 cancer. Hence, cancer causes considerable changes in skeletal muscle insulin signaling that is  
33 dependent of muscle-type, which could contribute to metabolic dysregulation in cancer. Thus,  
34 skeletal muscle could be a target for managing metabolism in cancer.

## 35 **1.0 Introduction**

36 Within the last decades, it has become evident that cancer causes severe systemic alterations  
37 of the host. While unwanted loss of skeletal muscle and fat mass, coined cachexia<sup>1</sup> is well-  
38 described, a lesser described burden of many cancers is the severe metabolic dysregulation.  
39 Evidently, several cancers, and in particular cachexia-inducing cancers, are associated with  
40 poor metabolic regulation, including insulin resistance in both pre-clinical models<sup>2-4</sup> and  
41 human patients<sup>5-9</sup>. While the underlying mechanisms are still poorly defined, they are crucial  
42 to delineate, as dysregulated metabolism is highly associated with cancer incidence, poor  
43 cancer prognosis, and increased recurrence rates<sup>10-15</sup>.

44 Skeletal muscle insulin resistance and dysregulated metabolism are detrimental to whole body  
45 glucose homeostasis, as skeletal muscle is responsible for the majority of insulin-stimulated  
46 glucose disposal<sup>16</sup>. We recently showed, that cancer causes severe insulin resistance in pre-  
47 cachectic tumor-bearing mice<sup>3</sup> on several parameters, including reduced skeletal muscle and  
48 white adipose tissue glucose uptake and abrogated insulin-stimulated microvascular  
49 perfusion<sup>3</sup>. Yet, the muscle-specific contributions and molecular defects were not identified in  
50 that study. In addition, it is unknown whether different muscle-types, Type I fiber- or Type II  
51 fiber-dominated muscles, are affected by cancer to a similar degree with regards to insulin  
52 resistance towards glucose uptake and anabolism.

53 To elucidate the muscle-intrinsic mechanisms that contribute to skeletal muscle insulin  
54 resistance in cancer, we here conducted a detailed investigation of glucose uptake and  
55 intramyocellular signaling in response to insulin in isolated oxidative (Type I fiber-dominated)  
56 and glycolytic (Type II fiber-dominated) muscles from tumor-bearing mice. It was hypothesized  
57 that muscles isolated from tumor-bearing mice would display altered insulin signaling leading  
58 to decreased glucose transport and anabolism.

## 59 **2.0 Materials and Methods**

### 60 **2.1 Animals and ethics**

61 A total of 28 C57bl6/J (Taconic, Lille Skensved, DK) mice, 12 weeks old, female, were group  
62 housed at ambient temperature (21–23 °C) with nesting materials. The mice were held on a 12  
63 h:12 h light-dark cycle with access to a standard rodent chow diet (Altromin no. 1324,  
64 Brogaarden, DK) and water *ad libitum*. All experiments were approved by the Danish Animal  
65 Experimental Inspectorate (Licence: 2016-15-0201-01043). The sample size (n=>10 in each  
66 condition) were decided from previous work with the experimental incubation setup. The  
67 experimental unit is a single animal.

### 68 **2.2 Lewis Lung Carcinoma**

69 Lewis Lung Carcinoma (LLC) cancer was induced as previously described<sup>3</sup>. LLC cells (ATCC®  
70 CRL1642™) were cultured in DMEM, high glucose (Gibco, #41966-029, USA) supplemented  
71 with 10% fetal bovine serum (FBS, Sigma-Aldrich, #F0804, USA), 1% penicillin-streptomycin  
72 (ThermoFisher Scientific, #15140122, USA) (5% CO<sub>2</sub>, 37 °C). Prior to inoculation into mice, LLC  
73 cells were trypsinized and washed twice with PBS. LLC cells were suspended in PBS with a final  
74 concentration of  $2.5 \times 10^6$  cells/ml. All mice were shaved on the flank two days prior to the  
75 inoculation and randomized into two groups with similar average body weight. The mice were  
76 subcutaneously injected with PBS with or without  $2.5 \times 10^5$  LLC cells into the right flank. The  
77 experiments were carried out 19 and 21 days after cancer cell inoculation. Mice developing  
78 ulcerations (human endpoint) were sacrificed by cervical dislocation. Mice with tumor >0.5  
79 gram were excluded. Three animals were excluded due to the size of the tumor.

### 80 **2.3 Ex vivo muscle incubations**

81 On the day of experimentation, fed mice were anaesthetized by intraperitoneal injection of  
82 pentobarbital/lidocain (6 mg of pentobarbital sodium and 0.6 mg of lidocain/100 g of body  
83 weight) after which soleus and EDL muscles were tied with non-absorbable 4-0 silk suture  
84 loops (Look SP116, Surgical Specialities Corporation) at both ends and suspended between  
85 adjustable hooks at resting length (1–2 mN tension) in *ex vivo* incubation chambers (Multi  
86 Myograph system, Danish Myo-Technology) at 30°C with continuously 95% O<sub>2</sub>/5% CO<sub>2</sub>-  
87 bubbled Krebs–Ringer–Henseleit (KRH) buffer (118.5 mM NaCl, 24.7 mM NaHCO<sub>3</sub>, 4.74 mM  
88 KCl, 1.18 mM MgSO<sub>4</sub>·7H<sub>2</sub>O, 1.18 mM KH<sub>2</sub>PO<sub>4</sub>, 2.5 mM CaCl<sub>2</sub>·2H<sub>2</sub>O) supplemented with 8 mM

89 mannitol and 2 mM pyruvate (KRH medium). The experimental groups were randomized  
90 between chambers. The tumors and spleens were also dissected at this stage, rinsed and snap  
91 frozen in liquid nitrogen, before the mice were sacrificed by cervical dislocation. After  
92 dissection, the muscles were first allowed 15 min of recovery in fresh KRH buffer and then  
93 incubated for 10 min in KRH with or without 1.5 nM of insulin (sub-maximal dose). Next, the  
94 medium was changed to one containing radioactively labelled 2-[3H] deoxyglucose (2-DG; 0.30  
95  $\mu\text{Ci/ml}$  in 1 mM non-radiolabelled 2-DG) and mannitol (0.28  $\mu\text{Ci/ml}$  in 8 mM non-radiolabelled  
96 mannitol) and 10 min of tracer labelling were allowed. For the insulin-stimulated group, the  
97 same insulin concentration was maintained in the tracer medium. Finally, the muscles were  
98 harvested, rinsed in ice-cold KRH medium, dabbed dry on paper and snap-frozen in liquid  
99 nitrogen until further analysis.

#### 100 ***2.4 Immunoblotting and glucose transport measurements***

101 The frozen soleus and EDL muscles were trimmed free of connective tissue and sutures and  
102 weighed. Muscles were homogenized 1 min at 30 Hz using a TissueLyser II bead mill (Qiagen,  
103 USA) in 300  $\mu\text{l}$  ice-cold homogenization buffer, pH 7.5 (10% glycerol, 1% NP-40, 20 mM sodium  
104 pyrophosphate, 150 mM NaCl, 50 mM HEPES (pH 7.5), 20 mM  $\beta$ -glycerophosphate, 10 mM NaF,  
105 2 mM phenylmethylsulfonyl fluoride, 1 mM EDTA (pH 8.0), 1 mM EGTA (pH 8.0), 2 mM  $\text{Na}_3\text{VO}_4$ ,  
106 10  $\mu\text{g/ml}$  leupeptin, 10  $\mu\text{g/ml}$  aprotinin, 3 mM benzamidine). After the homogenization, the  
107 samples were rotated end-over-end for 30 min at 4 °C, before being subjected to centrifugation  
108 (9500 RCF) for 20 min at 4 °C. The lysates were then collected. Lysate protein concentrations  
109 were measured using the bicinchoninic acid method with bovine serum albumin (BSA) as a  
110 standard. A fraction (50  $\mu\text{l}$ ) of the lysate was dissolved in 2 ml of  $\beta$ -scintillation liquid (Ultima  
111 Gold, Perkin Elmer) for measurement of 2-DG transport using [ $^{14}\text{C}$ ]mannitol to estimate  
112 extracellular space using  $\beta$ -scintillation counting. The 2-DG transport was related to the protein  
113 concentration of the lysate. The measurements of 2-DG transport were blinded.

114 The remaining lysate were used for standard immunoblotting of total proteins and  
115 phosphorylation levels of relevant proteins. In brief, Polyvinylidene difluoride membranes  
116 (Immobilon Transfer Membrane; Millipore) were blocked in Tris-buffered saline (TBS)-Tween  
117 20 containing 2% skim milk or 3% bovine serum albumin (BSA) for 5 min at room temperature.  
118 Membranes were incubated with primary antibodies (Table 1) overnight at 4 °C, followed by  
119 incubation with HRP-conjugated secondary antibody for 45 min at room temperature.

120 Coomassie brilliant blue staining was used as a loading control<sup>17</sup>. The same coomassie brilliant  
 121 blue staining is presented, when the same four samples are presented for several proteins  
 122 investigated using the same membrane (e.g. Fig. 3). To ensure quantification within the linear  
 123 range for each antibody probed, a standard curves were made for total proteins, basal and  
 124 insulin-stimulated conditions. Bands were visualized using the Bio-Rad ChemiDoc MP Imaging  
 125 System and enhanced chemiluminescence (ECL+; Amersham Biosciences). Bands were  
 126 quantified using Bio-Rad's Image Lab software 6.0.1.

**Table 1: Antibodies**

| Protein                    | Company                                      | Catalog # | Dilution                 |
|----------------------------|----------------------------------------------|-----------|--------------------------|
| Akt2                       | Cell signaling technology                    | 3063      | 1:1000, 2% Skim milk     |
| pAkt ser473                | Cell signaling technology                    | 9271      | 1:1000, 2% Skim milk     |
| pAkt thr308                | Cell signaling technology                    | 9275      | 1:1000, 2% Skim milk     |
| TBC1D4                     | Abcam                                        | ab189890  | 1:1000, 2% Skim milk     |
| pTBC1D4 thr642             | Cell signaling technology                    | 8881      | 1:1000, 2% Skim milk     |
| pTBC1D4 ser588             | Cell signaling technology                    | 8730      | 1:1000, 2% Skim milk     |
| pTBC1D4 ser318             | Cell signaling technology                    | 8619      | 1:1000, 2% Skim milk     |
| p70S6K total               | Cell signaling technology                    | 2708      | 1:1000, 2% Skim milk     |
| p p70S6K thr389            | Cell signaling technology                    | 9205      | 1:1000, 2% Skim milk     |
| Ribosomal protein S6 (rS6) | Cell signaling technology                    | 2217      | 1:1000, 3% Skim milk     |
| rS6 ser235/ser236          | Cell signaling technology                    | 2211      | 1:1000, 3% BSA           |
| Hexokinase II              | Cell signaling technology                    | 2867      | 1:1000, 2% Skim milk     |
| GLUT4                      | Thermo Fisher Scientific                     | PA1-1065  | 1:1000, 2% Skim milk     |
| Pyruvate dehydrogenase     | D.G. Hardie (University of Dundee, Scotland) | -         | 1 µg/mL, 2% Skim milk    |
| AMPK alpha2                | Abcam                                        | 3760      | 1:1000, 2% Skim milk     |
| pAMPK thr172               | Cell signaling technology                    | 2531      | 1:1000, 2% Skim milk     |
| ACC total                  | Dako - streptavidin                          | P0397     | 1:2500, 3% BSA           |
| pACC ser212                | Cell signaling technology                    | 3661      | 1:1000, 2% Skim milk     |
| ULK1                       | Cell signaling technology                    | 8054      | 1:500, 3% BSA            |
| pULK ser757                | Cell signaling technology                    | 6888      | 1:1000, 2% Skim milk     |
| mTOR total                 | Cell signaling technology                    | 2983      | 1:1000 2 % skim milk     |
| p-mTOR ser2448             | Cell signaling technology                    | 2971      | 1:1000 2 % skim milk     |
| Rodent Oxphos              | Abcam                                        | ab110413  | 1:5000, 2% Skim milk     |
| FATP4                      | Abcam                                        | ab200353  | 0.442µg/µL, 2% Skim milk |
| Citrate Synthase           | Abcam                                        | ab96600   | 1:5000, 3% BSA           |
| Glycogen Synthase          | Gift from Prof. Oluf Pedersen                | -         | 1:20000 2 % skim milk    |
| GSK3 beta                  | BD Bioscience                                | 610202    | 1:1000 2 % skim milk     |
| pGSK3 alpha/beta ser21/9   | Cell signaling technology                    | 9331      | 1:1000, 2% Skim milk     |

127

128 **2.5 Statistics**

129 All statistics were performed using GraphPad Prism, 8.0 (GraphPad Software, La Jolla, CA, USA).  
130 Statistical testing was performed using student's t-test and two-way repeated measures ANOVA  
131 (the two EDL muscles and the two soleus muscles from the same mouse were treated as pairs  
132 comparing basal vs. insulin stimulation) as applicable. The main effects and interactions are  
133 presented in the figures when significant. For post-hoc analyses, a Sidak's multiple comparisons  
134 test was performed. The significance level was set at  $\alpha < 0.05$ .

135 **2.6 Data presentation and graphics**

136 All graphs were created using GraphPad Prism, 9.0 (GraphPad Software, La Jolla, CA, USA). All  
137 figures were created using Inkscape (Inkscape.org). Illustrations were created using  
138 ©BioRender.com.

139 **3.0 Results**

140 **3.1 Cancer leads to a minor reduction in GLUT4 protein content in soleus muscle**

141 At day 19-21 post tumor inoculation, soleus and EDL muscles were isolated, incubated, and  
142 stimulated with or without a submaximal concentration of insulin (Fig. 1A). On the  
143 experimental day, the average tumor size was ~2.0 gram (Fig. 1B) and body mass tended lower  
144 ( $p=0.0867$ ) in tumor-bearing mice (Fig. 1C). Spleen weight was increased (+145%, Fig. 1D),  
145 indicative of pre-cachexia and elevated inflammation in tumor-bearing mice compared to  
146 controls.

147 We firstly investigated key proteins related to glucose transport and mitochondrial proteins,  
148 namely glucose transporter 4 (GLUT4), hexokinase II (HK II), glycogen synthase (GS), pyruvate  
149 dehydrogenase (PDH), subunits of the electron transport chain (ETC), citrate synthase (CS), and  
150 long-chain fatty acid transport protein 4 (FATP4). Cancer lead to a minor reduction in protein  
151 content of GLUT4 (-9%) and complex 4 of the ETC (-13%) in soleus muscle of tumor-bearing  
152 mice compared to control mice. No effects of cancer were observed on the other proteins  
153 investigated in either muscles (GLUT4; Fig. 1E/F, HK II; Fig. 1E/F, GS; Fig. 1E/F, PDH; Fig. 1E/F,  
154 ETC; Fig. 1G/H, CS; Fig. 1G/H and FATP4; Fig. 1G/H). Representative western blots are shown  
155 in Fig. 1I. Collectively, no major changes were observed for key proteins related to glucose  
156 handling.

157 **3.2 Cancer selectively causes insulin resistance in oxidative soleus muscle**

158 We next investigated the glucose transport during submaximal (1.5 nM) insulin stimulation. As  
159 expected, insulin increased glucose transport in both soleus (+115%, Fig. 2A/B) and EDL  
160 (+55%, Fig. 2C/D) muscles from non-tumor-bearing control mice. Remarkably, this response  
161 was abrogated in the oxidative soleus muscle of tumor-bearing mice (Fig. 2A/B). This effect was  
162 muscle-type specific, as insulin increased glucose transport by 70% in the glycolytic EDL  
163 muscle from tumor-bearing mice with no effect of cancer (Fig. 2C/D). These data demonstrate  
164 that cancer affects muscles differently dependent on muscle-type; oxidative or glycolytic. We  
165 subsequently investigated insulin signaling pathways (Fig. 2E), in order to determine the  
166 molecular underpinnings of the different response to cancer in muscle.

167 **3.3 Cancer inhibits insulin-stimulated TBC1D4 and GSK3 phosphorylation**

168 Proximal insulin signaling via phosphorylation (p) of Akt threonine(thr)308 (Fig. 3A) and pAkt  
169 serine(ser)473 (Fig. 3B) was similarly increased by insulin in control and tumor-bearing mice, .  
170 The Rab GTPase activating protein TBC1D4, downstream of Akt, is inactivated by  
171 phosphorylation, which is necessary for translocation of GLUT4 to the plasma membrane<sup>18</sup>. As  
172 TBC1D4 has multiple insulin-sensitive phosphorylation sites, we measured if any alteration in  
173 these phospho-sites could explain the lack of effect of insulin on glucose uptake in soleus  
174 muscle. More specifically, we investigated pTBC1D4 ser318, ser588, and thr642 (in mice;  
175 ser324, ser595, thr649), which are all phosphorylated during insulin stimulation<sup>19,20</sup>, and are  
176 direct targets of Akt, but also other kinases<sup>21</sup>. In soleus muscle of control mice, insulin led to a  
177 35% increased phosphorylation of ser318 (Fig. 3C), 60% increased ser588 (Fig. 3D), and 150%  
178 increased thr642 (Fig. 3E) of TBC1D4. In contrast, none of these phosphorylations were  
179 increased during insulin stimulation in soleus muscle from tumor-bearing mice (Fig. 3C, 3D,  
180 and 3E). In addition, basal pTBC1D4 at ser588 (Fig. 3D) and thr642 (p=0.086, Fig. 3E) were  
181 increased or tended to be increased, respectively, in soleus of tumor-bearing mice compared to  
182 control mice. This was in contrast to EDL, where insulin increased the phosphorylation of all  
183 the above mentioned phospho-sites independent of cancer (Fig. 3C, 3D, and 3E). In fact, the  
184 post-hoc test demonstrated that the insulin-effect on TBC1D4 ser588 and thr642 was driven  
185 by the increase in the EDL muscles from the tumor-bearing mice.  
186 Thus, these data show that in soleus muscle, cancer impairs insulin signal transduction to  
187 TBC1D4 on several phosphorylation sites, which could explain the reduced insulin-stimulated



188 glucose uptake observed in soleus muscle of tumor-bearing mice. In contrast, no impairment of  
189 TBC1D4 phosphorylation was observed in EDL muscles from tumor-bearing mice that did not  
190 display any alterations in glucose uptake compared to control mice.

191 To test whether this phenotype transferred to other Akt substrates, we investigated the  
192 phosphorylation of glycogen synthase kinase 3 (GSK3)  $\alpha/\beta$ <sup>22,23</sup>. GSK3 $\alpha/\beta$  negatively regulate  
193 the protein glycogen synthase (synthesis of glycogen). Thus, phosphorylations of GSK3 $\alpha/\beta$   
194 (ser21/ser9) inhibit the kinase activity of glycogen synthase and thereby promote glycogen  
195 synthesis<sup>24,25</sup>. In control mice, insulin increased phosphorylation of GSK3  $\alpha/\beta$  in both soleus ( $\alpha$ :  
196 115% and  $\beta$ : 155%, Fig. 3F/G) and EDL muscle ( $\alpha$ : 100% and  $\beta$ : 120%, Fig. 3F/G). In both soleus  
197 from tumor-bearing mice, insulin-stimulated GSK3  $\alpha/\beta$  appeared diminished. Here, GSK3  $\alpha$   
198 phosphorylation increased by 35% in response to insulin (Fig. 3F), and GSK3  $\beta$  phosphorylation  
199 tended ( $p=0.097$ ) to increase (Fig. 3G). In EDL muscle from tumor-bearing mice, GSK3  
200 phosphorylation-sites ( $\alpha$ : 40%,  $p=0.07$ , and  $\beta$ : 65%,  $p=0.072$ ) tended increase in response to  
201 insulin (Fig. 3F/G). Total protein content of Akt2, TBC1D4, and GSK3  $\beta$  protein content were  
202 similar between control and tumor-bearing mice in both soleus and EDL muscle (Fig. 3H). Thus,  
203 cancer impaired GSK3 phosphorylation in both soleus muscle, indicative of defective glycogen  
204 synthesis in both insulin resistant soleus muscle and insulin sensitive EDL muscle.  
205 Representative western blots are shown in fig. 3I.

### 206 **3.4 Cancer promotes AMPK activation in EDL, but not soleus, muscle**

207 AMP-activated protein kinase (AMPK) is metabolic stress-sensor in muscle<sup>26</sup> that is proposed  
208 to be involved in glucose uptake in response to exercise<sup>27-30</sup>. AMPK also provide input to insulin  
209 signaling and is required for the increase in insulin-sensitivity after muscle contraction<sup>31,32</sup>.  
210 AMPK phosphorylates TBC1D4 on ser588<sup>21</sup>, which was upregulated in EDL muscles from  
211 tumor-bearing mice (Fig. 3D) and we therefore investigated AMPK signaling.

212 pAMPK thr172 (Fig. 4A) and pACC ser212 (a direct AMPK substrate) (Fig. 4B) were similar  
213 between control and tumor-bearing mice in soleus muscle. In contrast, both AMPK and ACC  
214 phosphorylations were upregulated in the EDL muscle of tumor-bearing mice (Fig. 4A and 4B),  
215 aligning with previous reports<sup>33,34</sup>. Total AMPK  $\alpha 2$  and ACC1/2 (Fig. 4C) protein content were  
216 not affected by cancer. Representative western blots are shown in fig. 4D. Thus, elevated AMPK  
217 activation might be involved in the protection from cancer-induced insulin resistance in EDL  
218 muscle.

219 ***3.5 Cancer altered mTORC1 signaling in both soleus and EDL muscle***

220 Mammalian target of rapamycin complex 1 (mTORC1) is a central regulator of cell size and  
221 protein synthesis<sup>35</sup>. Cancer can lead to decreased protein synthesis in human muscle<sup>36-38</sup>, and  
222 reduced/abrogated mTORC1 signaling has been observed in various pre-clinical cancer mouse  
223 models<sup>33,34,39-44</sup>. Thus, we next determined the effect of cancer on insulin-stimulated anabolic  
224 signaling in muscle.

225 Insulin-stimulated phosphorylation of mTOR at ser2448, a reported insulin-sensitive site<sup>45</sup>,  
226 was not affected by either sub-maximal insulin or cancer in soleus and EDL muscle (Fig. 4E).  
227 Despite no increase in mTOR phosphorylation, insulin increased phosphorylation of the  
228 downstream target of mTORC1, p70S6K thr389, in both soleus (+208%) and EDL (+134%,  
229 p=0.066) of control animals (Fig. 4F). This effect of insulin on p-p70S6K thr389 was completely  
230 abrogated in soleus muscle of tumor-bearing mice compared to control mice (Fig. 4F). In  
231 contrast, p-p70S6K thr389 was augmented in tumor-bearing mice during insulin stimulation  
232 compared to control mice in EDL muscle (+60%, Fig. 4F). p70S6K activity leads to  
233 phosphorylation of ribosomal protein S6 (rS6) at ser235/236<sup>46</sup>. In soleus muscle, insulin only  
234 led to an increase in phosphorylation in control animals, not tumor-bearing mice (+45%, Fig.  
235 4G) as seen for p-p70S6K thr389. In EDL muscle, insulin caused a main effect of increased p-  
236 rS6 ser235 with no effect of cancer (Fig. 4G). ULK1 is another downstream target of mTORC1  
237 and phosphorylation of ULK1 at ser757 leads to inhibition of autophagy<sup>47</sup> (Fig. 2E).  
238 Interestingly, phosphorylation of ULK1 at ser757 was abrogated in both soleus and EDL muscle  
239 of tumor-bearing mice, where this site increased in both muscles during insulin stimulation in  
240 control mice (soleus: +75%, EDL: +52%) (Fig. 4H). Thus, insulin leads to the phosphorylation  
241 of ULK, but seemingly not in tumor-bearing mice. Total mTOR, p70S6K, rS6, and ULK1 (Fig. 4I)  
242 protein content were unaffected by cancer. Representative western blots are shown in Fig. 4J.

243 Taken together, these results suggest that the observed cancer-induced impairment of glucose  
244 transport in soleus muscle also manifested in anabolic resistance indicated by disrupted  
245 mTORC1 downstream signaling during insulin stimulation.

246

## 247 4.0 Discussion

248 Here, we present evidence of selective insulin resistance within different muscle-types in  
249 response to cancer in mice (Fig. 5). A primary finding was that cancer prevented insulin-  
250 stimulated glucose transport in oxidative soleus muscle, but not glycolytic EDL muscle.  
251 Secondly, this selective insulin resistance was associated with an inability for insulin to elicit  
252 multi-site phosphorylation of the Rab GTPase activating protein, TBC1D4 and GSK3, despite full  
253 induction of pAkt. Thirdly, we found that insulin-stimulated mTORC1 signaling, p70S6K-S6-  
254 and ULK-signaling, were abrogated by cancer. Collectively, these data show that cancer  
255 selectively rewires oxidative soleus muscle causing severe insulin resistance, which could lead  
256 to the metabolic dysregulation observed in cancer.

257 Our discovery that cancer abrogates insulin-stimulated glucose transport in soleus muscle  
258 expands on other studies that have reported reduced blood glucose-lowering effect of insulin  
259 *in vivo* of tumor-bearing rodents<sup>2-4</sup> and in patients with cancer<sup>5-9,48</sup>. Such findings are clinically  
260 relevant, because metabolic disturbances are associated with cancer incidence, poor cancer  
261 prognosis, and increased recurrence rates<sup>10-15</sup>. Whole body insulin resistance, measured by  
262 hyperinsulinemic-euglycemic clamp has been reported in cancers such as gastrointestinal<sup>6,8,48</sup>,  
263 colorectal<sup>5,8,48</sup>, lung<sup>8,9,48</sup>, and pancreatic cancer<sup>7</sup>. Based on our present results as well as a recent  
264 study<sup>3</sup>, whole body insulin resistance and glucose intolerance in many cancers are likely due to  
265 abrogated skeletal muscle glucose uptake. The results of the current investigation would  
266 suggest that distorted insulin signaling in muscle leads to insulin resistance specifically in  
267 oxidative muscles. In agreement with this observation, proteomic analyses of human<sup>49</sup> and  
268 rodent<sup>50,51</sup> skeletal muscle show that proteins involved in oxidative metabolism are highly  
269 altered in cancer cachexia.

270 A second important finding was that cancer-associated insulin resistance in soleus was  
271 accompanied by dysregulation on multiple phosphorylation-sites on TBC1D4 (ser318, ser588,  
272 and thr642), of which thr642 previously has been shown to be important for insulin-stimulated  
273 glucose uptake in skeletal muscle<sup>18,52</sup>. Interestingly, tumor-bearing mice displayed normal  
274 phosphorylation of Akt, which phosphorylates TBC1D4 at thr642. Thus, we speculate that the  
275 signal transduction from Akt to TBC1D4, TBC1D4 itself or TBC1D4 phosphatases are  
276 dysregulated in oxidative muscle of tumor-bearing mice. Similarly to our findings,  
277 phosphorylation at several sites on TBC1D4, including ser318, ser588, and ser751, are

278 impaired during insulin stimulation in muscles from patients with T2D<sup>53</sup>, suggesting that  
279 reduced TBC1D4 signaling can be a common trait in insulin resistant skeletal muscle. Likewise,  
280 T2D has been associated with mild reductions in skeletal muscle expression of GLUT4  
281 protein<sup>54,55</sup>, which was also observed in soleus muscle of tumor-bearing mice, but this is not  
282 always observed in T2D<sup>53</sup>. Reduced GLUT4 protein content align with TBC1D4 dysregulation  
283 as lack of TBC1D4 or loss-of-function mutants result in reduced GLUT4 content in mouse  
284 skeletal muscle<sup>56</sup> and human muscle<sup>57</sup>.

285 In contrast to the insulin resistant soleus muscle of tumor-bearing mice, the insulin sensitive  
286 EDL muscle displayed normal insulin-induced TBC1D4 phosphorylation and cancer had no  
287 effects on GLUT4 protein content. In fact, TBC1D4 ser588 was elevated in EDL muscles of  
288 tumor-bearing mice. AMPK is a kinase for TBC1D4 including at the ser588 site<sup>21</sup>, and we  
289 speculate that the elevated AMPK signaling in EDL muscles from tumor-bearing mice may be a  
290 compensatory mechanism that preserves insulin sensitivity. Notably, AMPK is a positive  
291 regulator of insulin sensitivity via TBC1D4 after muscle contractions<sup>31,32</sup> and AMPK seems to  
292 be required for normal insulin-induced signaling of the TBC1D4 paralogue and Rab GTPase  
293 activating protein, TBC1D1, in mouse muscle<sup>58</sup>. Our findings thus identify an intriguing link  
294 between AMPK and insulin sensitivity in the context of cancer that should be explored in future  
295 studies.

296 A third major finding was that insulin-stimulated p-p70S6K thr389, p-rS6 ser235/236, and  
297 pULK ser757 were abolished in soleus muscle of tumor-bearing mice, indicative of reduced  
298 mTORC1 signaling and anabolic resistance. mTORC1 signaling in skeletal muscle has previously  
299 been reported to be decreased in cancer cachexia at baseline<sup>33,39-41</sup>, during contraction<sup>40,42</sup>, and  
300 after an intraperitoneal glucose injection<sup>34</sup>. Yet, other studies show unchanged or increased  
301 mTORC1 signaling in cachectic rodent models<sup>59</sup> and humans<sup>60</sup>. Our study show that altered  
302 mTORC1 activity also extends to insulin-stimulated mTORC1 signaling and suggests that  
303 cancer-associated insulin resistance extends to the level of anabolism. The current data support  
304 the theory that cancer leads to muscle insulin resistance<sup>61-63</sup>, which in turn could accelerate  
305 muscle loss in cancer cachexia. However, this has yet to be experimentally verified in pre-  
306 clinical models or patients.

307 In conclusion, we show that cancer leads to marked insulin resistance in oxidative mouse soleus  
308 muscle evidenced by blocked insulin-stimulated glucose transport and abolished insulin-

309 induced phosphorylation of TBC1D4 and GSK3 at multiple phosphorylation sites. Furthermore,  
310 cancer impaired mTORC1 signaling, measured via p70S6K-rS6 and ULK1 phosphorylation, in  
311 soleus muscle, while only ULK1 phosphorylation was impaired in EDL muscle of tumor-bearing  
312 mice. Our results shows how cancer leads to insulin resistance in a muscle-type specific  
313 manner, and we identify the potential molecular mechanisms leading to this phenotype, which  
314 could guide future studies and optimize cancer therapy.

### 315 **Conflict of interest**

316 The authors declare no conflict of interest.

### 317 **CRedit authorship contribution statement**

318 **Steffen H. Raun:** Conceptualization, Methodology, Validation, Formal analysis, Investigation,  
319 Writing - Original Draft, Visualization, Project administration. **Jonas Roland Knudsen:**  
320 Conceptualization, Methodology, Validation, Formal analysis, Investigation, Writing - Original  
321 Draft. **Thomas E. Jensen:** Investigation, Writing - Review & Editing. **Xiuqing Han:**  
322 Investigation, Writing - Review & Editing. **Lykke Sylow:** Conceptualization, Methodology,  
323 Writing - Original Draft, Supervision, Project administration, Funding acquisition.

### 324 **Acknowledgement**

325 We would like to acknowledge Nicoline Resen Andersen for the help with running parts of the  
326 immunoblotting in current study.

### 327 **Funding**

328 Steffen H. Raun is supported via a grant to Lykke Sylow from the Novo Nordisk Foundation  
329 (NNF180C0032082). Lykke Sylow is further supported by grants from Novo Nordisk  
330 Foundation (NNF160C0023418 and NNF200C0063577) and Independent Research Fund  
331 Denmark (9039-00170B). Jonas Roland Knudsen is supported by an international Postdoc  
332 grant from the Independent Research Fund Denmark.

### 333 **Data access**

334 For question(s) or access to data, please contact corresponding author Lykke Sylow.

335 **Figure legends**

336 ***Figure 1: The effect of Lewis Lung Carcinoma cells inoculation on tumor and spleen weight, body***  
337 ***mass and protein expression of proteins involved in glucose and fat metabolism.***

338 A) C57BL/6J mice were subcutaneously inoculated with Lewis Lung Carcinoma (LLC) cells (cancer) or  
339 saline (control) along the flank. Nineteen-21 days later the mice were sacrificed and soleus and *extensor*  
340 *digitorum longus* (EDL) muscles were incubated *ex vivo*. B) Tumor weight in LLC inoculated mice. C)  
341 Change (%) in body mass from the day of tumor inoculation (day 0). D) Spleen mass. Muscle protein  
342 expression of proteins involved in glucose metabolism in E) soleus and F) EDL, as well as mitochondrial  
343 proteins and proteins involved in fat metabolism in G) soleus, and H) EDL. I) Representative western  
344 blots of investigated proteins. For control mice; n=12, for tumor-bearing (cancer) mice; n=13. Effect of  
345 cancer; # / ### = p<0.05 / p<0.001.

346

347 ***Figure 2: Muscle glucose transport is affected in the oxidative soleus muscle of tumor-bearing mice,***  
348 ***not the glycolytic extensor digitorum longus muscle.***

349 A) 2-deoxyglucose transport in soleus muscles stimulated with or without insulin (1.5 nM), and B) the  
350 relative effect of insulin on glucose transport. C) 2-deoxyglucose transport in *extensor digitorum longus*  
351 (EDL) muscles stimulated with or without insulin (1.5 nM), and D) the relative effect of insulin on  
352 glucose transport. E) Schematic illustration of the insulin signaling pathways investigated in current  
353 study. For control mice; n=12, for tumor-bearing mice; n=13. The connecting lines illustrate muscles  
354 from the same mouse (Basal (Bas) vs. insulin (Ins)). Effect of insulin; \*\*/ \*\*\* = p<0.01 / p<0.001. Effect  
355 of cancer; ## = p<0.01.

356

357 ***Figure 3: Cancer abrogates the insulin-stimulated phosphorylation of TBC1D4 in soleus muscle***

358 Quantification of A) phosphorylated (p) Akt thr308, B) pAkt ser473, C) pTBC1D4 ser318, D) pTBC1D4  
359 ser588, E) pTBC1D4 thr642, F) pGSK3- $\alpha$  ser21, G) pGSK3- $\beta$  ser9, and H) total proteins of Akt2, TBC1D4  
360 and GSK3- $\beta$ . I) Representative western blots of investigated proteins. For control mice; n=12, for tumor-  
361 bearing (cancer) mice; n=13. The connecting lines illustrate muscles from the same mouse (Basal (Bas)  
362 vs. insulin (Ins)). Effect of insulin; \* / \*\* / \*\*\* = p<0.05 / p<0.01 / p<0.001. Effect of cancer; # = p<0.05.

363 ***Figure 4: Cancer leads to disrupted or reduced mTORC1 signaling during insulin stimulation.***

364 Quantification of A) phosphorylated (p) AMPK thr172, B) pACC ser212, and C) total AMPK  $\alpha$ 2 and total  
365 ACC1/2 protein expression in both soleus and *extensor digitorum longus* (EDL) muscles. D)  
366 Representative western blots of phosphorylated and total AMPK and ACC. mTORC1 signaling was  
367 measured via phosphorylation of E) mTOR ser2448, F) p-p70S6K thr389, G) p-rS6 ser235, and H) pULK  
368 ser757. I) Total proteins of mTOR, p70S6K, rS6, ULK1. J) Representative western blots of investigated  
369 proteins in E-I. For control mice; n=12, for tumor-bearing mice; n=13, except for H) soleus (control mice;  
370 n=11, for tumor-bearing mice; n=12). The connecting lines illustrate muscles from the same mouse  
371 (Basal (Bas) vs. insulin (Ins)). Effect of insulin; \* / \*\* / \*\*\* = p<0.05 / p<0.01 / p<0.001. Effect of cancer;  
372 # / ## = p<0.05 / p<0.01.

373 ***Figure 5: Schematic illustration of the data presented in current study***

374 **References**

- 375 1. Fearon, K. *et al.* Definition and classification of cancer cachexia: An international consensus.  
376 *Lancet Oncol.* **12**, 489–495 (2011).
- 377 2. Alves, C. R. R. *et al.* Exercise training reverses cancer-induced oxidative stress and decrease in  
378 muscle COPS2/TRIP15/ALIEN. *Mol. Metab.* **39**, 101012 (2020).
- 379 3. Han, X. *et al.* Cancer causes metabolic perturbations associated with reduced insulin-stimulated  
380 glucose uptake in peripheral tissues and impaired muscle microvascular perfusion. *Metabolism*  
381 **105**, 154169 (2020).
- 382 4. Asp, M. L., Tian, M., Wendel, A. A. & Belury, M. A. Evidence for the contribution of insulin  
383 resistance to the development of cachexia in tumor-bearing mice. *Int. J. cancer* **126**, 756–63  
384 (2010).
- 385 5. Copeland, G. P., Leinster, S. J., Davis, J. C. & Hipkin, L. J. Insulin resistance in patients with  
386 colorectal cancer. *Br. J. Surg.* **74**, 1031–5 (1987).
- 387 6. Pisters, P. W., Cersosimo, E., Rogatko, A. & Brennan, M. F. Insulin action on glucose and  
388 branched-chain amino acid metabolism in cancer cachexia: differential effects of insulin.  
389 *Surgery* **111**, 301–10 (1992).
- 390 7. Permert, J. *et al.* Is profound peripheral insulin resistance in patients with pancreatic cancer  
391 caused by a tumor-associated factor? *Am. J. Surg.* **165**, 61–6; discussion 66-7 (1993).
- 392 8. Yoshikawa, T., Noguchi, Y., Doi, C., Makino, T. & Nomura, K. Insulin resistance in patients with  
393 cancer: Relationships with tumor site, tumor stage, body-weight loss, acute-phase response,  
394 and energy expenditure. *Nutrition* **17**, 590–593 (2001).
- 395 9. Winter, A., MacAdams, J. & Chevalier, S. Normal protein anabolic response to  
396 hyperaminoacidemia in insulin-resistant patients with lung cancer cachexia. *Clin. Nutr.* **31**, 765–  
397 73 (2012).
- 398 10. Renehan, A. G., Tyson, M., Egger, M., Heller, R. F. & Zwahlen, M. Body-mass index and incidence  
399 of cancer: a systematic review and meta-analysis of prospective observational studies. *Lancet*  
400 *(London, England)* **371**, 569–78 (2008).
- 401 11. Bhaskaran, K. *et al.* Body-mass index and risk of 22 specific cancers: a population-based cohort  
402 study of 5·24 million UK adults. *Lancet (London, England)* **384**, 755–65 (2014).
- 403 12. Calle, E. E., Rodriguez, C., Walker-Thurmond, K. & Thun, M. J. Overweight, obesity, and mortality  
404 from cancer in a prospectively studied cohort of U.S. adults. *N. Engl. J. Med.* **348**, 1625–38  
405 (2003).
- 406 13. Campbell, P. T., Newton, C. C., Patel, A. V, Jacobs, E. J. & Gapstur, S. M. Diabetes and cause-specific  
407 mortality in a prospective cohort of one million U.S. adults. *Diabetes Care* **35**, 1835–44 (2012).
- 408 14. Harding, J. L. *et al.* Trends in cancer mortality among people with vs without diabetes in the  
409 USA, 1988-2015. *Diabetologia* **63**, 75–84 (2020).
- 410 15. Calip, G. S. *et al.* Metabolic syndrome and outcomes following early-stage breast cancer. *Breast*  
411 *Cancer Res. Treat.* **148**, 363–77 (2014).
- 412 16. DeFronzo, R. A. *et al.* The Effect of Insulin on the Disposal of Intravenous Glucose: Results from  
413 Indirect Calorimetry and Hepatic and Femoral Venous Catheterization. *Diabetes* **30**, 1000–1007  
414 (1981).

- 415 17. Welinder, C. & Ekblad, L. Coomassie staining as loading control in Western blot analysis. *J.*  
416 *Proteome Res.* **10**, 1416–1419 (2011).
- 417 18. Kramer, H. F. *et al.* AS160 regulates insulin- and contraction-stimulated glucose uptake in  
418 mouse skeletal muscle. *J. Biol. Chem.* **281**, 31478–85 (2006).
- 419 19. Kane, S. *et al.* A Method to Identify Serine Kinase Substrates. *J. Biol. Chem.* **277**, 22115–22118  
420 (2002).
- 421 20. Sano, H. *et al.* Insulin-stimulated Phosphorylation of a Rab GTPase-activating Protein Regulates  
422 GLUT4 Translocation. *J. Biol. Chem.* **278**, 14599–14602 (2003).
- 423 21. Geraghty, K. M. *et al.* Regulation of multisite phosphorylation and 14-3-3 binding of AS160 in  
424 response to IGF-1, EGF, PMA and AICAR. *Biochem. J.* **407**, 231–41 (2007).
- 425 22. Beurel, E., Grieco, S. F. & Jope, R. S. Glycogen synthase kinase-3 (GSK3): Regulation, actions, and  
426 diseases. *Pharmacol. Ther.* **148**, 114–131 (2015).
- 427 23. Cross, D. A. E., Alessi, D. R., Cohen, P., Andjelkovich, M. & Hemmings, B. A. Inhibition of glycogen  
428 synthase kinase-3 by insulin mediated by protein kinase B. *Nature* **378**, 785–789 (1995).
- 429 24. Parker, P. J., Caudwell, F. B. & Cohen, P. Glycogen Synthase from Rabbit Skeletal Muscle; Effect of  
430 Insulin on the State of phosphorylation of the Seven Phosphoserine Residues in vivo. *Eur. J.*  
431 *Biochem.* **130**, 227–234 (1983).
- 432 25. Cohen, P. The Croonian Lecture 1998. Identification of a protein kinase cascade of major  
433 importance in insulin signal transduction. *Philos. Trans. R. Soc. London. Ser. B Biol. Sci.* **354**, 485–  
434 495 (1999).
- 435 26. Kjøbsted, R. *et al.* AMPK in skeletal muscle function and metabolism. *FASEB J.* **0**, fj.201700442R  
436 (2017).
- 437 27. Kjøbsted, R. *et al.* AMPK and TBC1D1 Regulate Muscle Glucose Uptake After, but Not During,  
438 Exercise and Contraction. *Diabetes* **68**, 1427–1440 (2019).
- 439 28. Sylow, L. *et al.* Rac1 and AMPK Account for the Majority of Muscle Glucose Uptake Stimulated by  
440 Ex Vivo Contraction but Not In Vivo Exercise. *Diabetes* **66**, 1548–1559 (2017).
- 441 29. O’Neill, H. M. *et al.* AMP-activated protein kinase (AMPK) beta1beta2 muscle null mice reveal an  
442 essential role for AMPK in maintaining mitochondrial content and glucose uptake during  
443 exercise. *Proc. Natl. Acad. Sci. U. S. A.* **108**, 16092–7 (2011).
- 444 30. Mu, J., Brozinick, J. T., Valladares, O., Bucan, M. & Birnbaum, M. J. A role for AMP-activated  
445 protein kinase in contraction- and hypoxia-regulated glucose transport in skeletal muscle. *Mol.*  
446 *Cell* **7**, 1085–1094 (2001).
- 447 31. Kjøbsted, R. *et al.* Enhanced Muscle Insulin Sensitivity After Contraction/Exercise Is Mediated  
448 by AMPK. *Diabetes* **66**, 598–612 (2017).
- 449 32. Kjøbsted, R. *et al.* TBC1D4 Is Necessary for Enhancing Muscle Insulin Sensitivity in Response to  
450 AICAR and Contraction. *Diabetes* **68**, 1756–1766 (2019).
- 451 33. Bohnert, K. R. *et al.* Inhibition of ER stress and unfolding protein response pathways causes  
452 skeletal muscle wasting during cancer cachexia. *FASEB J.* **30**, 3053–3068 (2016).
- 453 34. White, J. P. *et al.* Muscle mTORC1 suppression by IL-6 during cancer cachexia: a role for AMPK.  
454 *AJP Endocrinol. Metab.* **304**, E1042–E1052 (2013).



- 455 35. Saxton, R. A. & Sabatini, D. M. mTOR Signaling in Growth, Metabolism, and Disease. *Cell* **168**,  
456 960–976 (2017).
- 457 36. Smith, K. & Tisdale, M. Increased protein degradation and decreased protein synthesis in  
458 skeletal muscle during cancer cachexia. *Br. J. Cancer* **67**, 680–685 (1993).
- 459 37. Hanson, E. D. *et al.* Attenuation of Resting but Not Load-Mediated Protein Synthesis in Prostate  
460 Cancer Patients on Androgen Deprivation. *J. Clin. Endocrinol. Metab.* (2017)  
461 doi:10.1210/jc.2016-3383.
- 462 38. Williams, J. P. *et al.* Effect of tumor burden and subsequent surgical resection on skeletal muscle  
463 mass and protein turnover in colorectal cancer patients. *Am. J. Clin. Nutr.* **96**, 1064–1070  
464 (2012).
- 465 39. Gallot, Y. S. *et al.* Myostatin Gene Inactivation Prevents Skeletal Muscle Wasting in Cancer.  
466 *Cancer Res.* **74**, 7344–7356 (2014).
- 467 40. Hardee, J. P. *et al.* Inflammatory signalling regulates eccentric contraction-induced protein  
468 synthesis in cachectic skeletal muscle. *J. Cachexia. Sarcopenia Muscle* **9**, 369–383 (2018).
- 469 41. Huot, J. R. *et al.* Formation of colorectal liver metastases induces musculoskeletal and metabolic  
470 abnormalities consistent with exacerbated cachexia. *JCI Insight* **5**, (2020).
- 471 42. Puppa, M. J., Murphy, E. A., Fayad, R., Hand, G. A. & Carson, J. A. Cachectic skeletal muscle  
472 response to a novel bout of low-frequency stimulation. *J. Appl. Physiol.* **116**, 1078–1087 (2014).
- 473 43. Yamada, T., Ashida, Y., Tatebayashi, D., Abe, M. & Himori, K. Cancer Cachexia Induces  
474 Preferential Skeletal Muscle Myosin Loss When Combined With Denervation. *Front. Physiol.* **11**,  
475 (2020).
- 476 44. Hardee, J. P., Montalvo, R. N. & Carson, J. A. Linking Cancer Cachexia-Induced Anabolic  
477 Resistance to Skeletal Muscle Oxidative Metabolism. *Oxid. Med. Cell. Longev.* **2017**, 1–14 (2017).
- 478 45. Reynolds, T. H., Bodine, S. C. & Lawrence, J. C. Control of Ser2448 Phosphorylation in the  
479 Mammalian Target of Rapamycin by Insulin and Skeletal Muscle Load. *J. Biol. Chem.* **277**,  
480 17657–17662 (2002).
- 481 46. Roux, P. P. *et al.* RAS/ERK Signaling Promotes Site-specific Ribosomal Protein S6  
482 Phosphorylation via RSK and Stimulates Cap-dependent Translation. *J. Biol. Chem.* **282**, 14056–  
483 14064 (2007).
- 484 47. Kim, J., Kundu, M., Viollet, B. & Guan, K.-L. AMPK and mTOR regulate autophagy through direct  
485 phosphorylation of Ulk1. *Nat. Cell Biol.* **13**, 132–141 (2011).
- 486 48. Yoshikawa, T., Noguchi, Y. & Matsumoto, A. Effects of tumor removal and body weight loss on  
487 insulin resistance in patients with cancer. *Surgery* **116**, 62–66 (1994).
- 488 49. Ebhardt, H. A. *et al.* Comprehensive proteome analysis of human skeletal muscle in cachexia and  
489 sarcopenia: a pilot study. *J. Cachexia. Sarcopenia Muscle* **8**, 567–582 (2017).
- 490 50. Barreto, R. *et al.* Cancer and chemotherapy contribute to muscle loss by activating common  
491 signaling pathways. *Front. Physiol.* **7**, 1–13 (2016).
- 492 51. Shum, A. M. Y. *et al.* Proteomic profiling of skeletal and cardiac muscle in cancer cachexia:  
493 alterations in sarcomeric and mitochondrial protein expression. *Oncotarget* **9**, 22001–22022  
494 (2018).
- 495 52. Chen, S., Wasserman, D. H., MacKintosh, C. & Sakamoto, K. Mice with AS160/TBC1D4-Thr649Ala

- 496 Knockin Mutation Are Glucose Intolerant with Reduced Insulin Sensitivity and Altered GLUT4  
497 Trafficking. *Cell Metab.* **13**, 68–79 (2011).
- 498 53. Vind, B. F. *et al.* Impaired insulin-induced site-specific phosphorylation of TBC1 domain family,  
499 member 4 (TBC1D4) in skeletal muscle of type 2 diabetes patients is restored by endurance  
500 exercise-training. *Diabetologia* **54**, 157–167 (2011).
- 501 54. Gaster, M., Staehr, P., Beck-Nielsen, H., Schrøder, H. D. & Handberg, A. GLUT4 Is Reduced in Slow  
502 Muscle Fibers of Type 2 Diabetic Patients. *Diabetes* **50**, 1324–1329 (2001).
- 503 55. Kampmann, U. *et al.* GLUT4 and UBC9 Protein Expression Is Reduced in Muscle from Type 2  
504 Diabetic Patients with Severe Insulin Resistance. *PLoS One* **6**, e27854 (2011).
- 505 56. Xie, B. *et al.* The Inactivation of RabGAP Function of AS160 Promotes Lysosomal Degradation of  
506 GLUT4 and Causes Postprandial Hyperglycemia and Hyperinsulinemia. *Diabetes* **65**, 3327–3340  
507 (2016).
- 508 57. Moltke, I. *et al.* A common Greenlandic TBC1D4 variant confers muscle insulin resistance and  
509 type 2 diabetes. *Nature* **512**, 190–193 (2014).
- 510 58. Pehmøller, C. *et al.* Genetic disruption of AMPK signaling abolishes both contraction- and  
511 insulin-stimulated TBC1D1 phosphorylation and 14-3-3 binding in mouse skeletal muscle. *Am. J.*  
512 *Physiol. Metab.* **297**, E665–E675 (2009).
- 513 59. Penna, F. *et al.* Muscle atrophy in experimental cancer cachexia: Is the IGF-1 signaling pathway  
514 involved? *Int. J. Cancer* **127**, 1706–1717 (2010).
- 515 60. Op Den Kamp, C. M. *et al.* Nuclear transcription factor  $\kappa$ B activation and protein turnover  
516 adaptations in skeletal muscle of patients with progressive stages of lung cancer cachexia. *Am. J.*  
517 *Clin. Nutr.* **98**, 738–748 (2013).
- 518 61. Raun, S. H., Buch-Larsen, K., Schwarz, P. & Sylow, L. Exercise—A Panacea of Metabolic  
519 Dysregulation in Cancer: Physiological and Molecular Insights. *Int. J. Mol. Sci.* **22**, 3469 (2021).
- 520 62. Porporato, P. E. Understanding cachexia as a cancer metabolism syndrome. *Oncogenesis* **5**,  
521 e200-10 (2016).
- 522 63. Dev, R., Bruera, E. & Dalal, S. Insulin resistance and body composition in cancer patients. *Ann.*  
523 *Oncol.* **29**, ii18–ii26 (2018).
- 524

# Figure 1

**A**

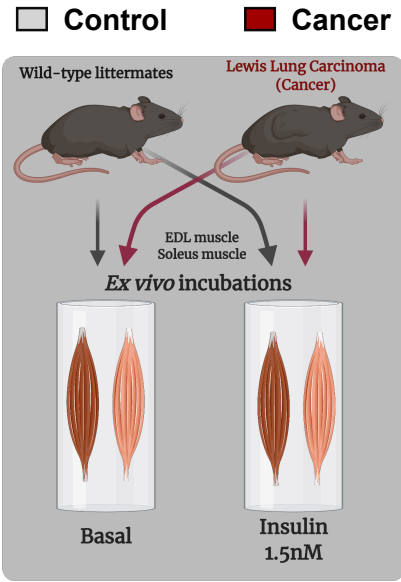

**B**

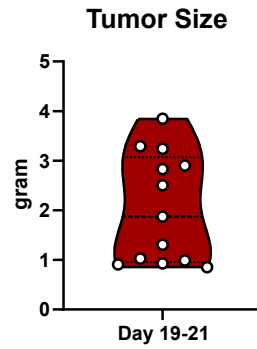

**C**

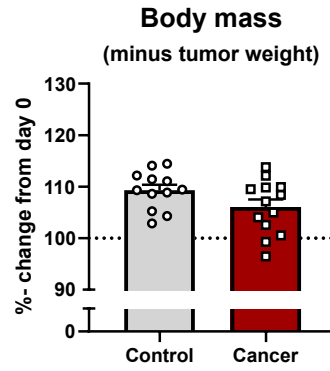

**D**

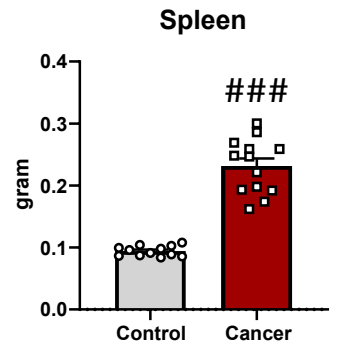

## Proteins involved in glucose metabolism

**E**

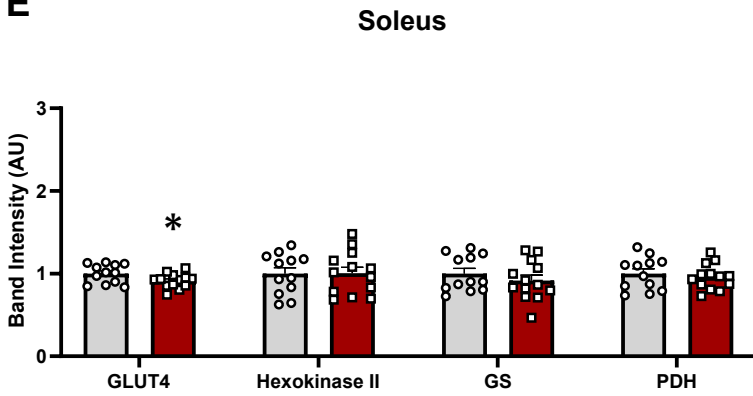

**F**

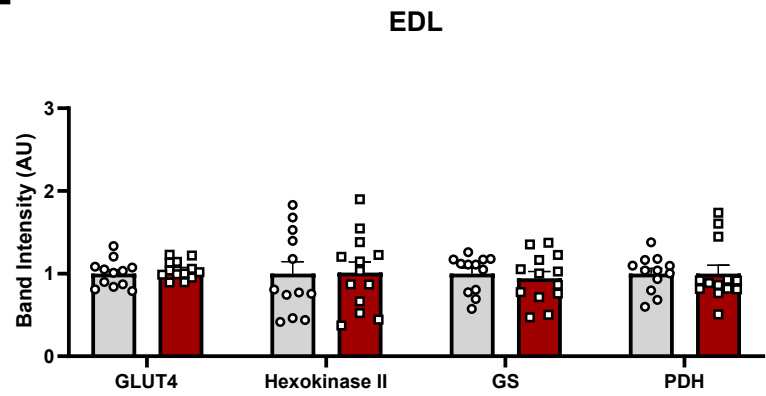

## Mitochondrial proteins and proteins involved in fat metabolism

**G**

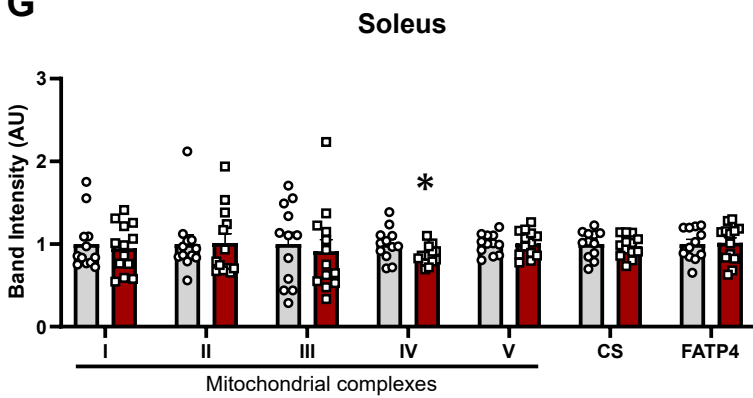

**H**

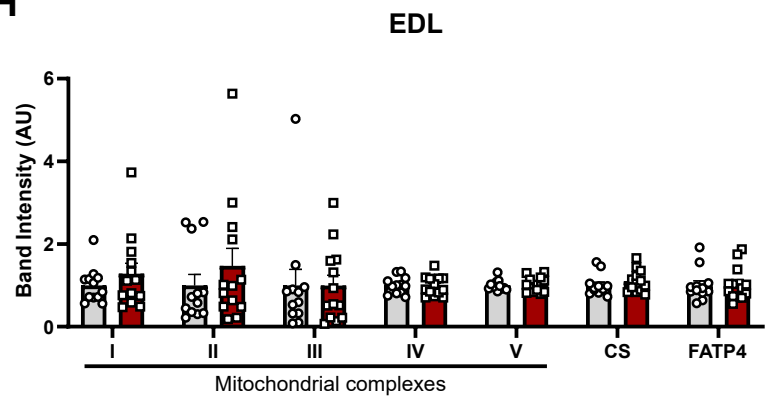

**I**

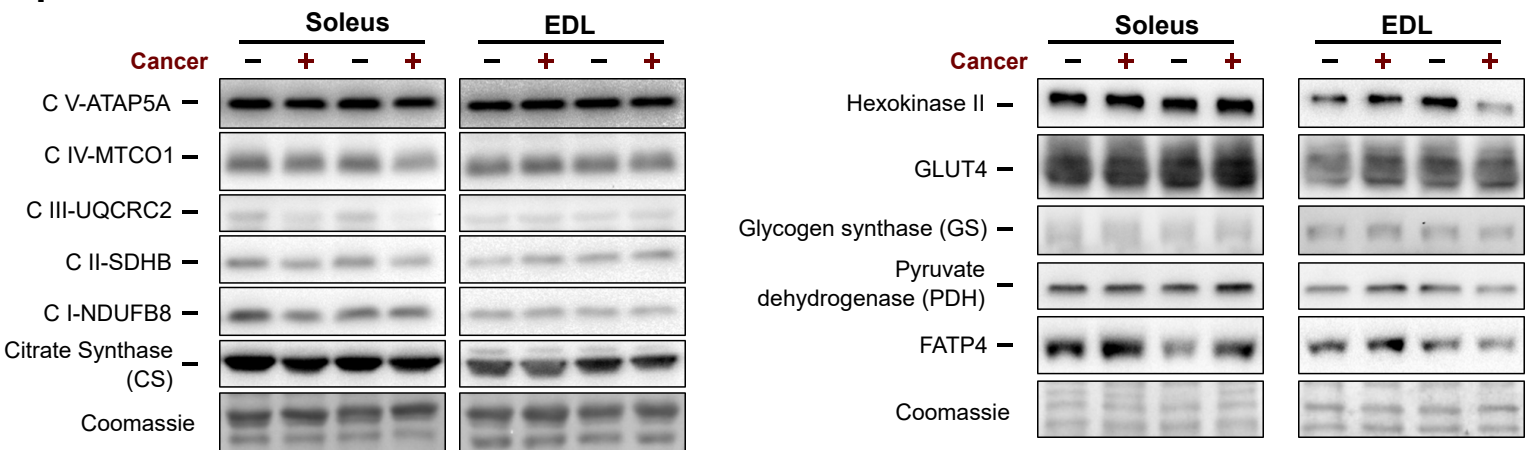

# Figure 2

□ Control    ■ Cancer

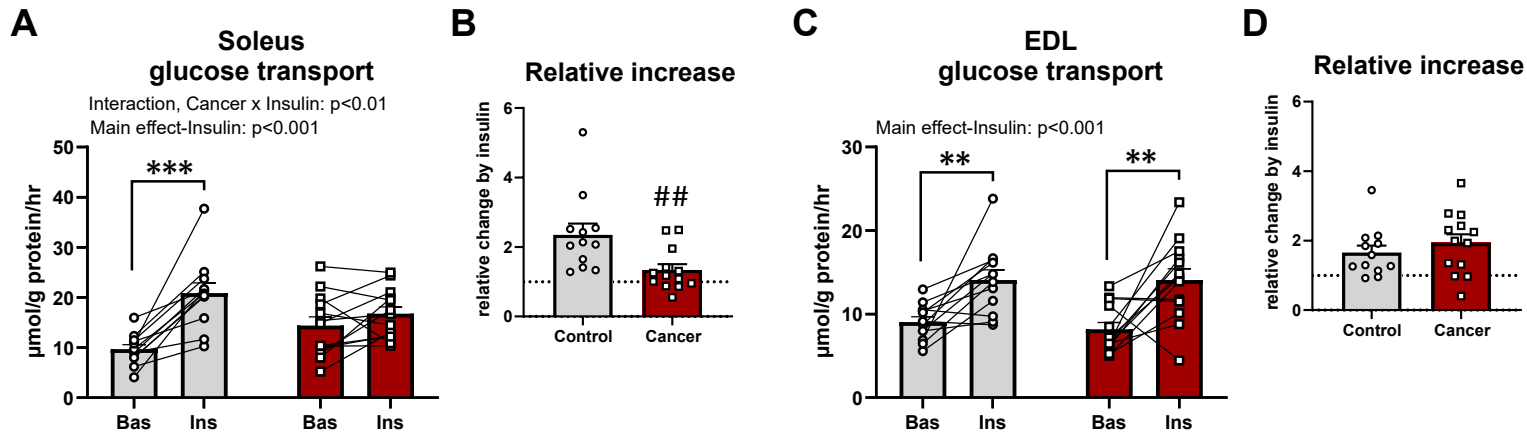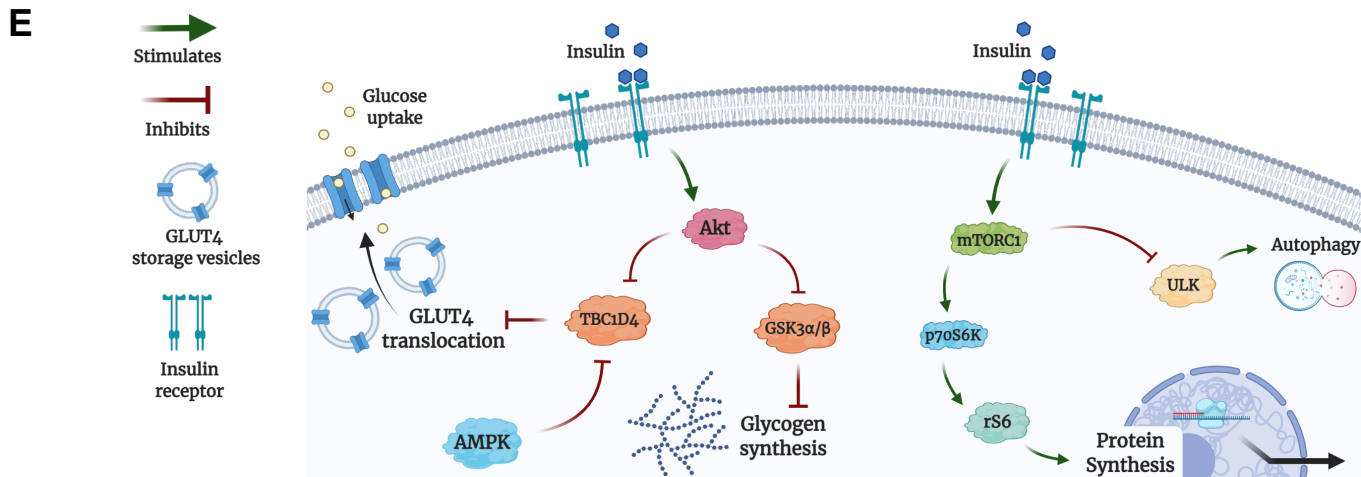

# Figure 3

Control Cancer

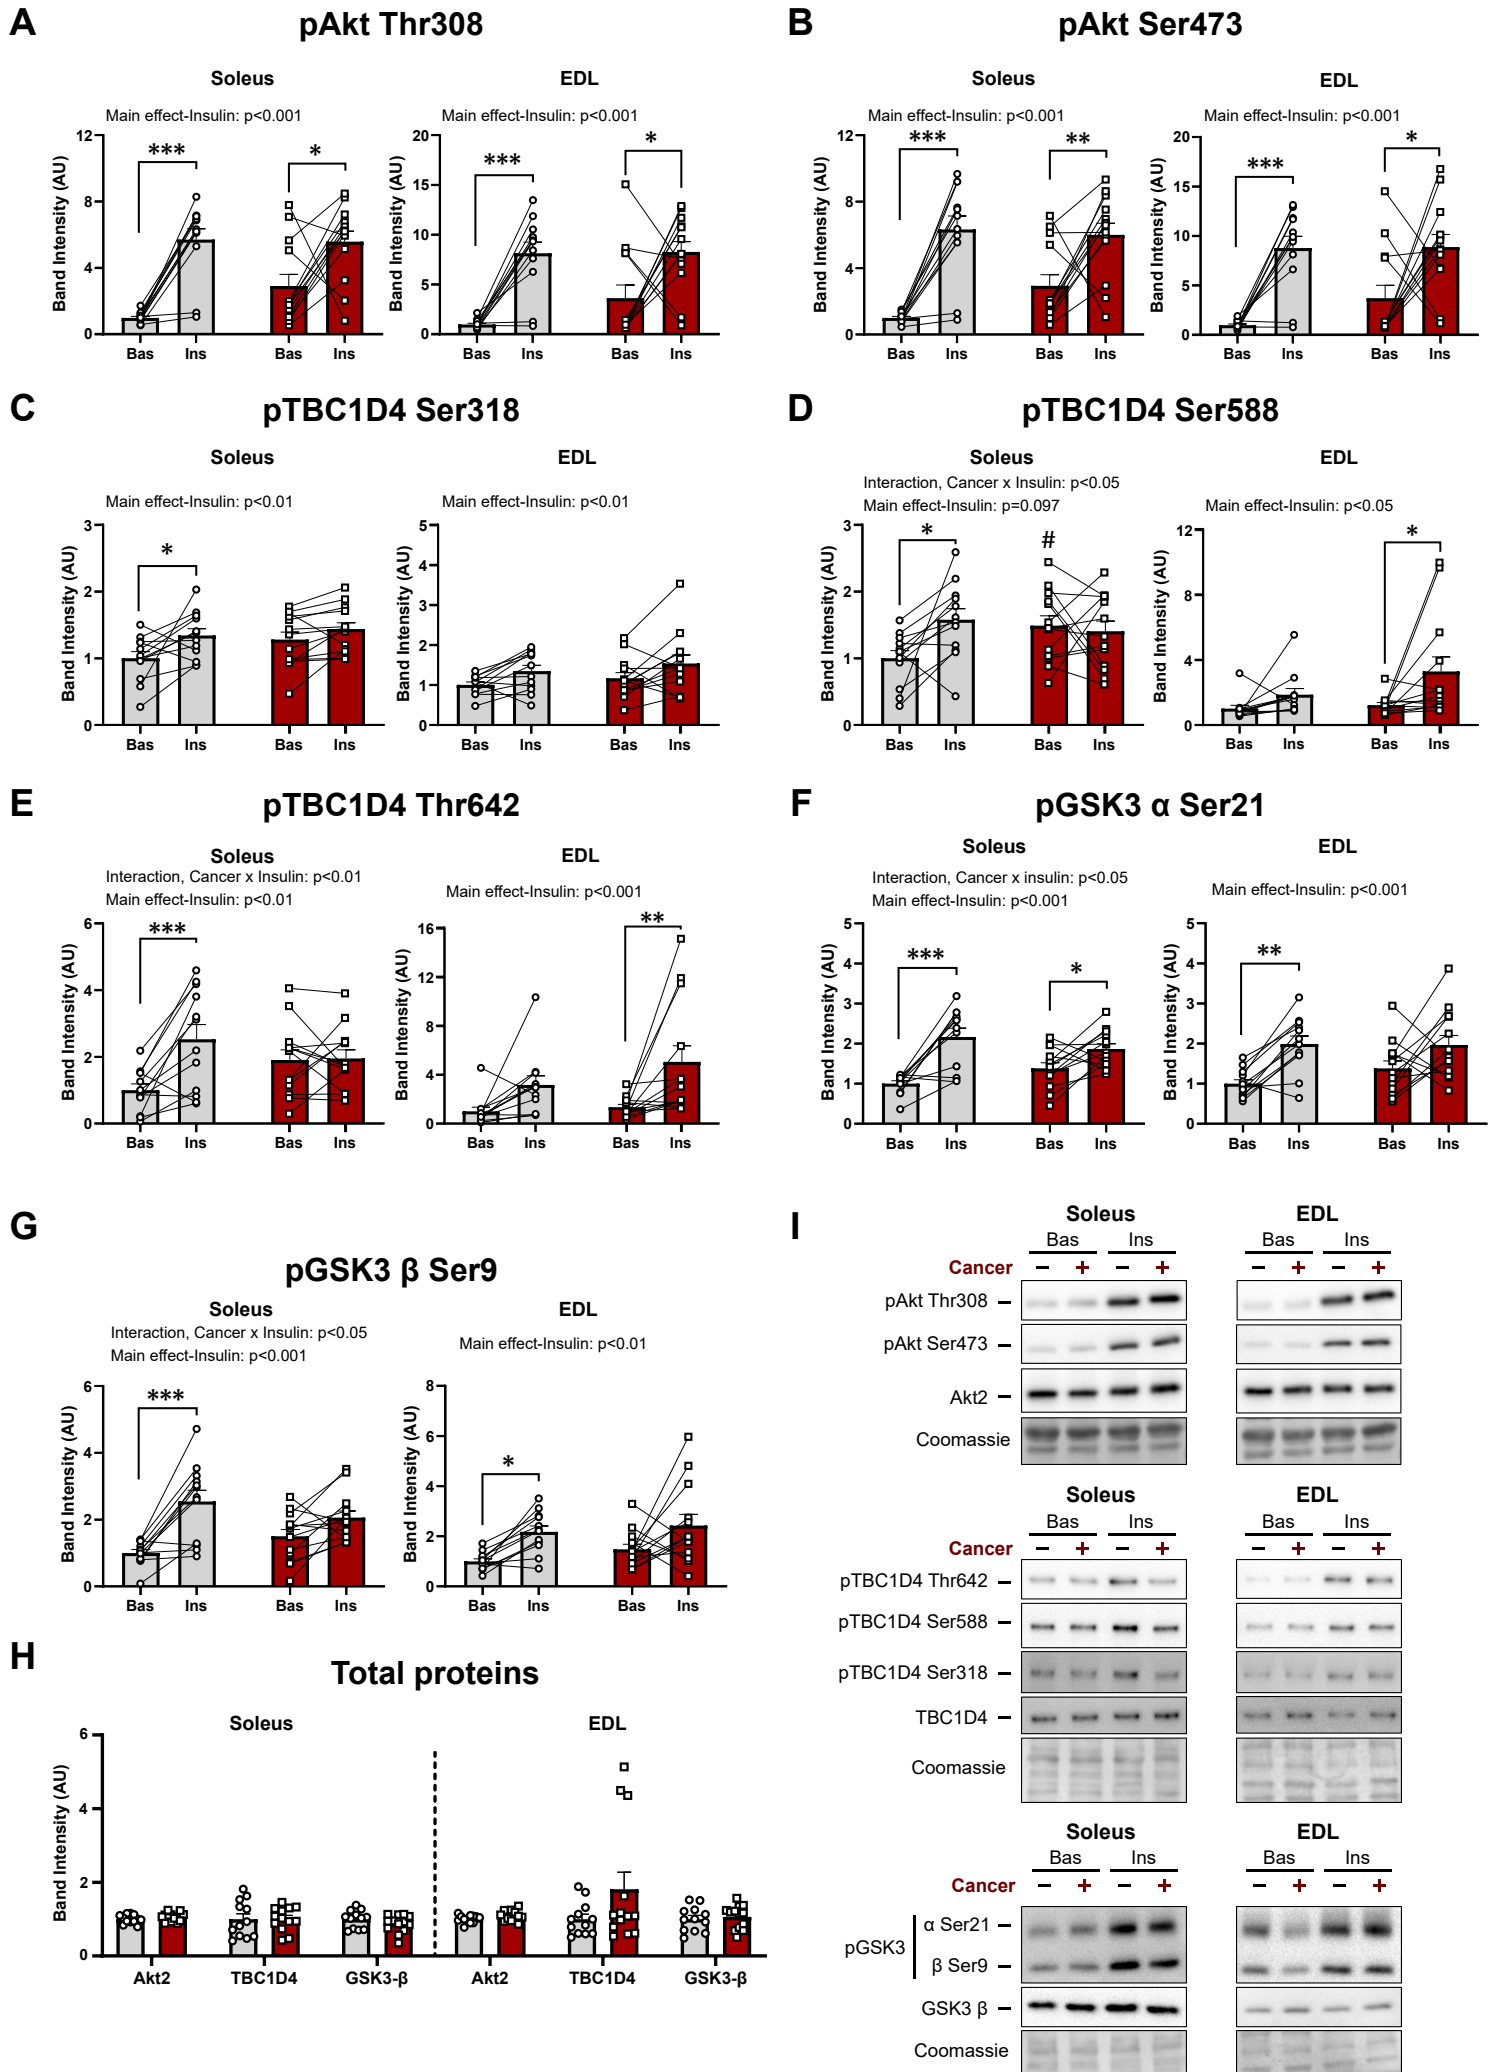

# Figure 4

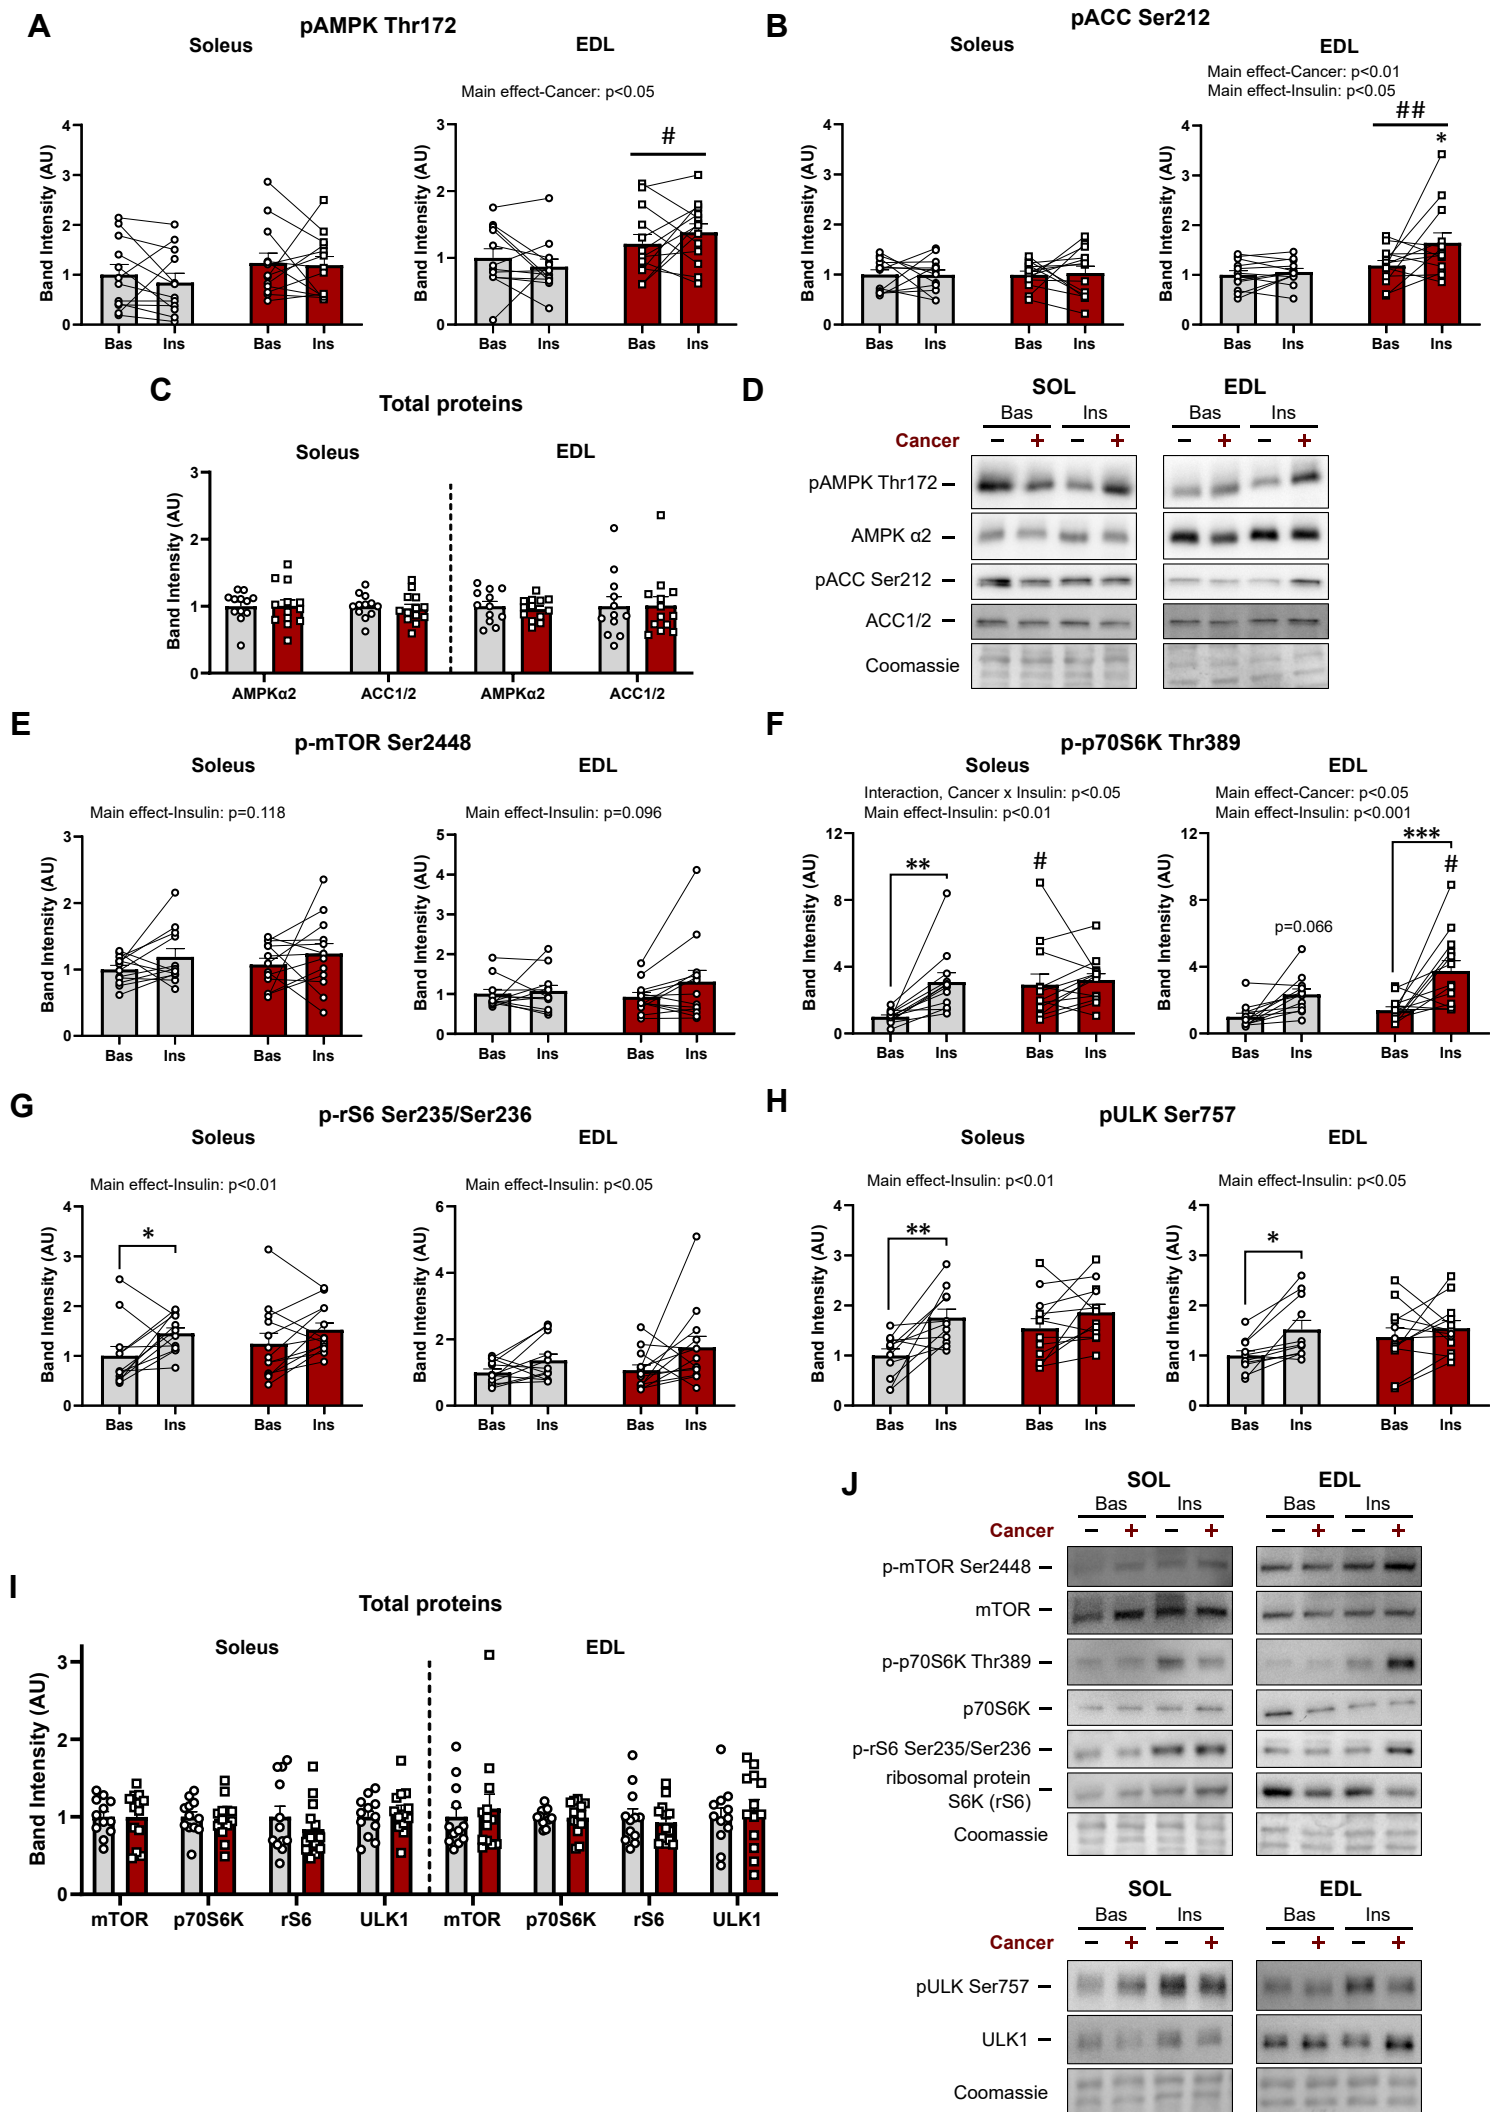

Figure 5

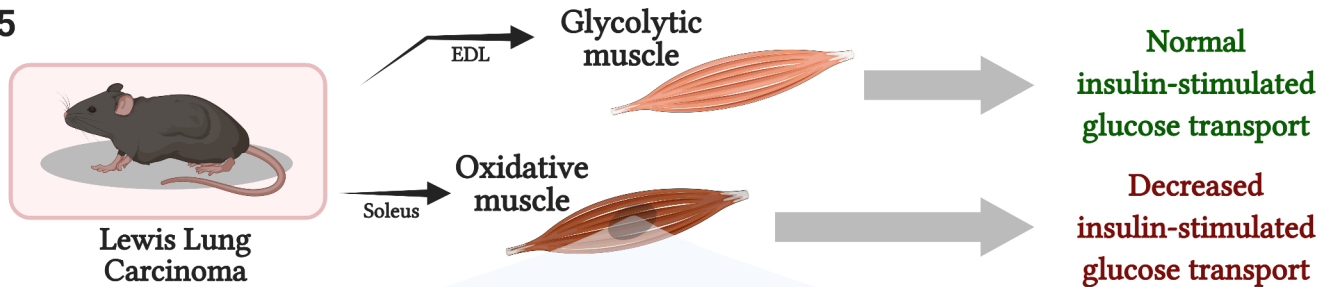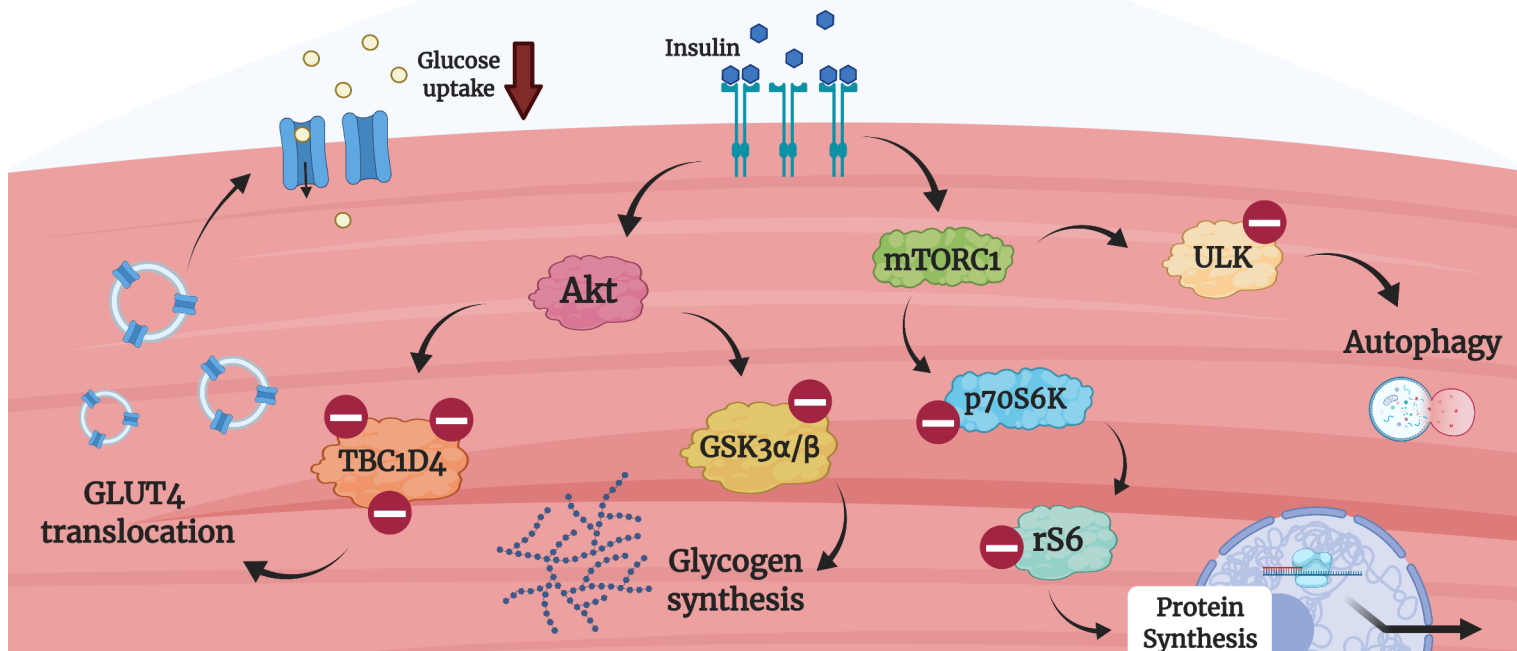

— = Decreased phosphorylation

GLUT4 storage vesicles

Insulin receptor

Glycogen
